# Supplementary material
Source: PubMed Central journal article supplement (PMC4384815)
Supplement: NIHMS674341-supplement-S1.pdf [file NIHMS674341-supplement-S1.pdf]

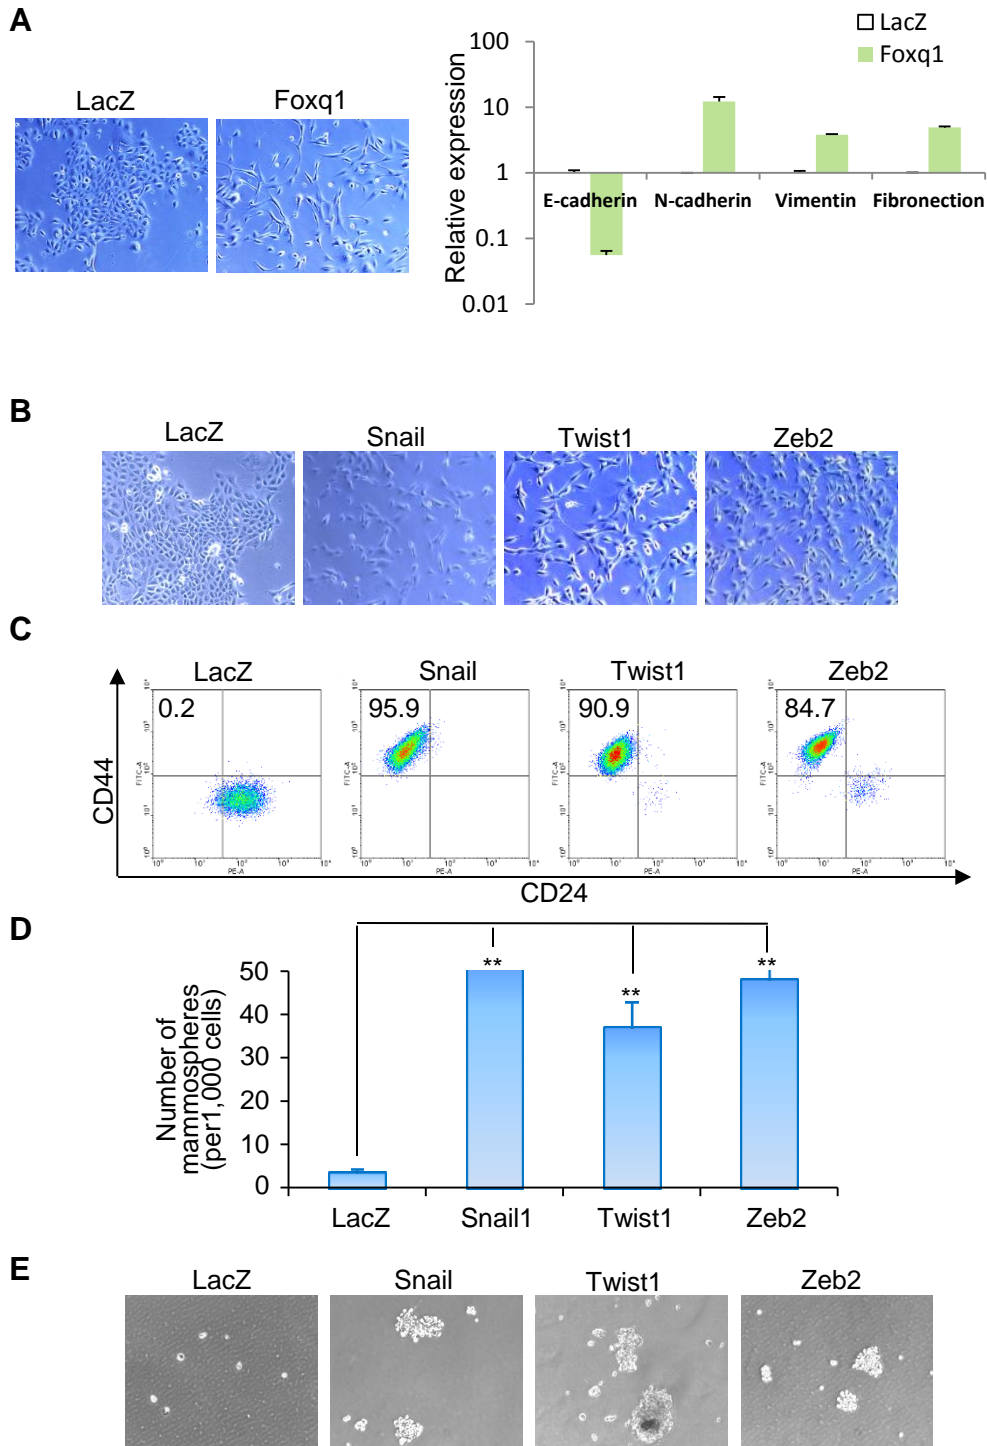

**Supplementary Figure S1. EMT promoting transcription factors induce stemness characteristics.**

**A**, Overexpression of Foxq1 significantly induced EMT in HMLE cells. Left Panel: Morphological change. Right panel: expression of EMT markers. **B**, Overexpression of Snail, Twist1 and Zeb2 significantly induced EMT in HMLE cells. **C**, Overexpression of Snail, Twist1 and Zeb2 significantly increased the CD44<sup>high</sup>/CD24<sup>low</sup> cell population in HMLE cells. **D**, Summary of the mammosphere formation assay for Snail1, Twist1 and Zeb2 overexpressing HMLE cells (\*\* $P < 0.01$ ). **E**, Representative figures for the mammosphere formation assay of Snail1, Twist1 and Zeb2 overexpressed HMLE cells. HMLE cells transfected with LacZ was used as a control.

**A**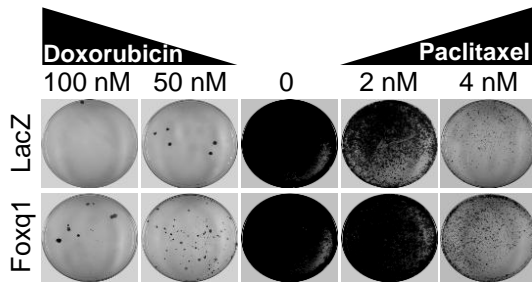**B**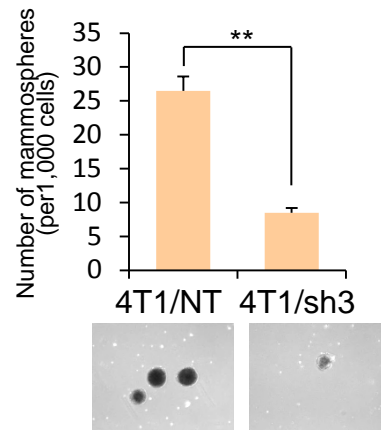**C**

| Cell types | Numbers of implanted cells |            |           |
|------------|----------------------------|------------|-----------|
|            | 20,000                     | 9,000      | 3,000     |
| 4T1/NT     | 5/5 (100%)                 | 5/5 (100%) | 4/5 (80%) |
| 4T1/sh3    | 5/5 (100%)                 | 4/5 (80%)  | 1/5 (20%) |

**D**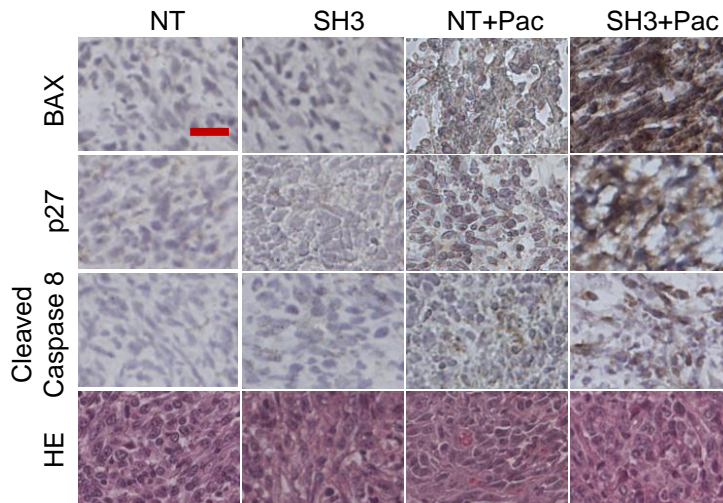

**Supplementary Figure S2. The role of Foxq1 in drug resistance, mammosphere formation and tumor initiation.** **A**, Representative images of the clonogenic assays of HMLE cells with or without Foxq1 overexpression treated with different doses of doxorubicin (dox) or paclitaxel (pac). **B**, Knockdown of Foxq1 significantly decrease mammosphere formation ability of 4T1 cells. Top panel: summary of mammosphere formation results. Bottom panels: representative image of mammosphere formation. **C**, Summary of tumor initiation capability of Foxq1 in 4T1 cells. Five mice were used for each group. Percentiles represent tumor formation in specific groups. **D**, The effect of Foxq1 in apoptosis. Tumors were collected from the 4T1 implanted BALB/C mice, and the prepared tissue slides were analyzed with IHC using anti-BAX, p27 and Cleaved Caspase 8 antibodies, as well as H&E staining. The origins of all four tumor samples are indicated at the top of the panels. NT: tumor from 4T1/NT cells bearing mouse. SH3: tumor from 4T1/SH3 Foxq1 knockdown cell bearing mouse. NT+Pac: tumor from 4T1/NT cells bearing mice treated with Paclitaxel. SH3+Pac: tumor from 4T1/Sh3 cells bearing mice treated with Paclitaxel. Scale bar, 20  $\mu$ m.

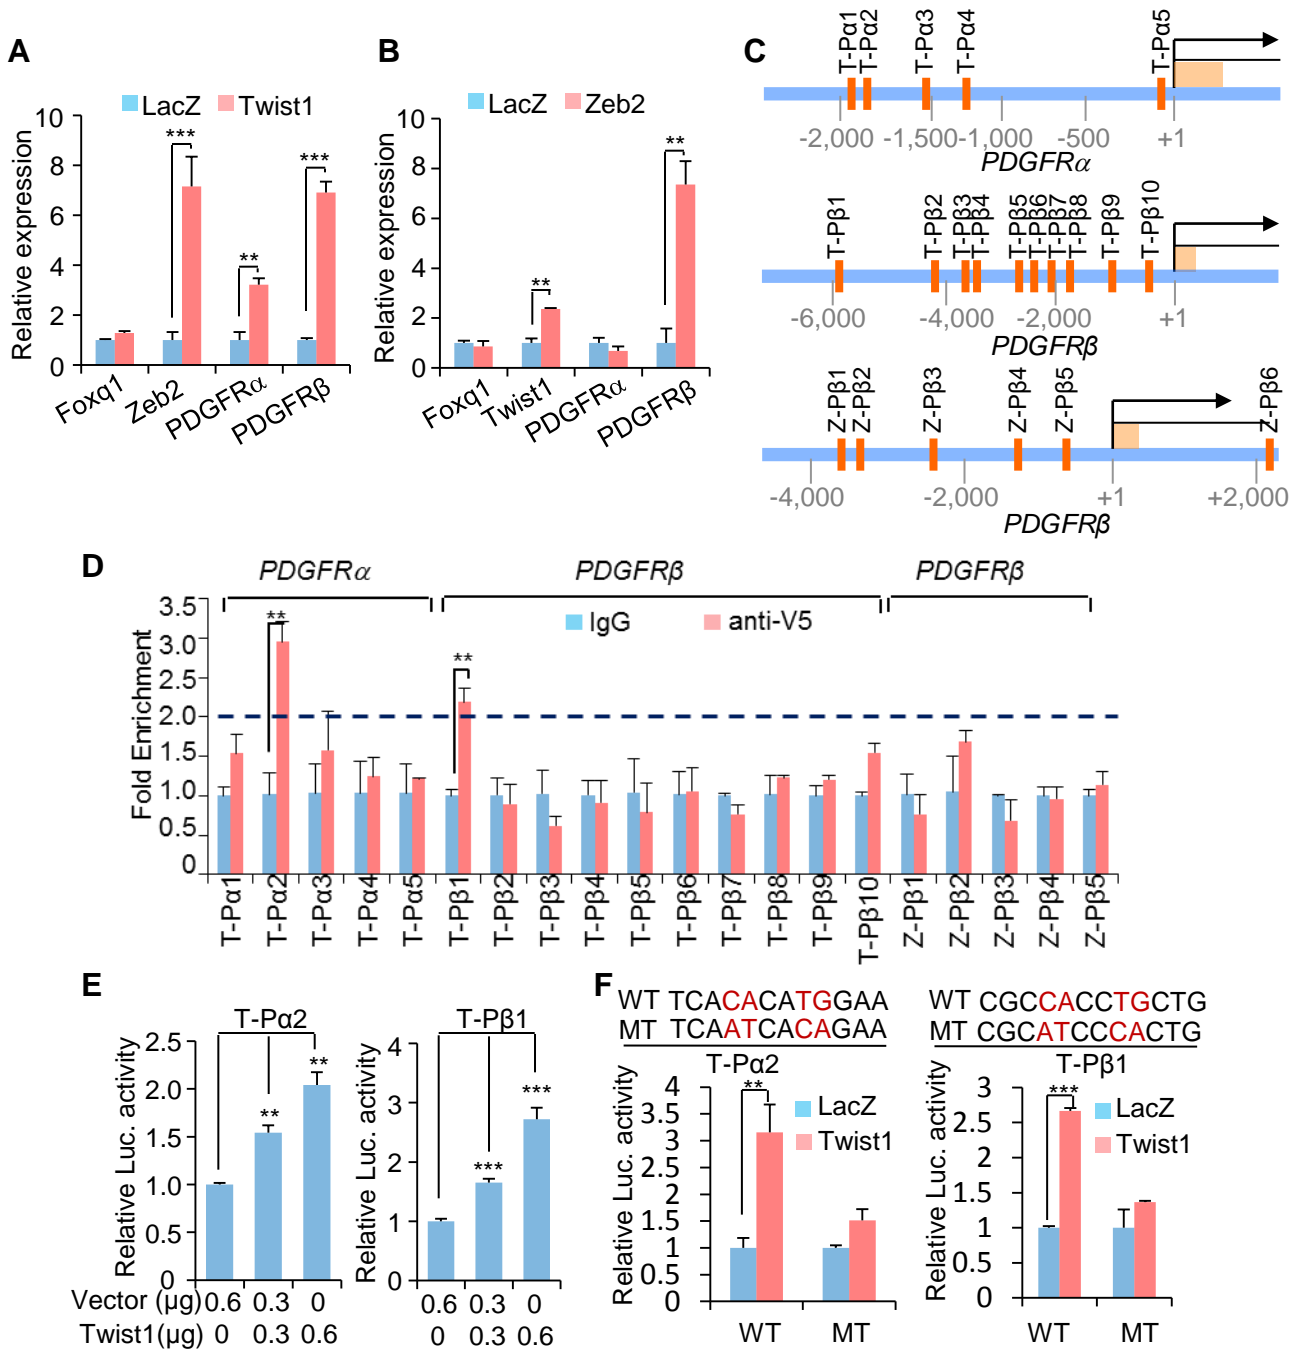

**Supplementary Figure S3. Twist1 and Zeb2 regulate PDGFRs.** **A and B**, The relative expression level of the Foxq1, Zeb2/Twist1 and PDGFR $\alpha$  and  $\beta$  genes in Twist1 (A) or Zeb2 (B) overexpressing HMLE cells was measured by real-time RT-PCR assay (\* $P < 0.05$ , \*\* $P < 0.01$  and \*\*\* $P < 0.001$ ). **C**, Potential binding sites of Twist1 and Zeb2 in the promoter regions of PDGFR $\alpha$  and  $\beta$  genes were identified by an in silico analysis. Top and middle panels show Twist1 binding sites in PDGFR $\alpha$  and  $\beta$  promoter region. Low panel shows Zeb2 binding site in PDGFR $\beta$  promoter region. The conserved binding sites are highlighted with red. **D**, ChIP-qPCR analysis shows that enrichment of one Twist1 binding site DNA from the PDGFR $\alpha$  and  $\beta$  promoter region, respectively (\*\* $P < 0.01$ ). Dotted line represents 2-fold enrichment. However, ChIP-qPCR assay did not show enrichment of DNA for Zeb2 binding in PDGFR $\beta$  promoter. **E**, Luciferase assay shows Twist1 activated the PDGFR $\alpha$  (left panel) and  $\beta$  (right panel) gene promoter in a dose-dependent manner (\*\* $P < 0.01$ , \*\*\* $P < 0.001$ ). **F**, The binding of Twist1 to the PDGFR $\alpha$  and  $\beta$  promoter region was confirmed by luciferase assay. The Twist1 conservative binding sequence (WT) and mutant sequence (MT) for PDGFR $\alpha$  and  $\beta$  promoters was shown on the top of the panels. The mutation of the binding sequence diminished the activation of both gene promoters by Twist1 (\*\* $P < 0.01$ , \*\*\* $P < 0.001$ ).

**A**

## Breast cancer of TCGA database

| Pvalue/correlation | FOXQ1   | Twist1   | PDGFR-A  | PDGFR-B |
|--------------------|---------|----------|----------|---------|
| FOXQ1              |         | 0.29     | 0.21     | 0.16    |
| Twist              | 4E-14   |          | 0.45     | 0.47    |
| PDGFR-A            | 4.6E-11 | <2.2E-16 |          | 0.67    |
| PDGFR-B            | 3.2E-4  | <2.2E-16 | <2.2E-16 |         |

**B**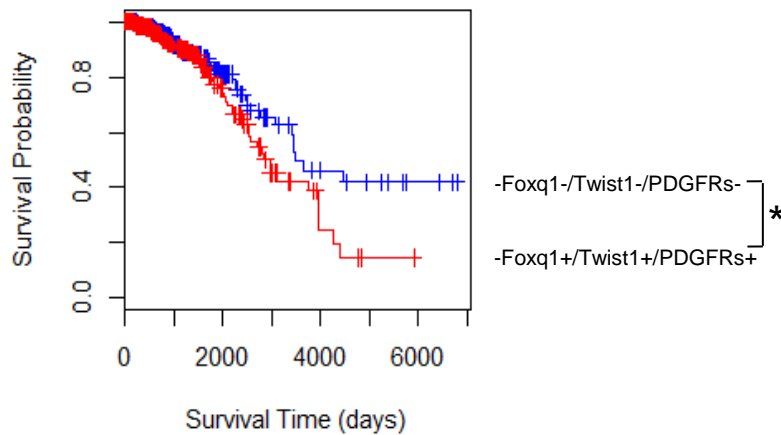**C**

## UCEC of TCGA database

| Pvalue/Correlation | FOXQ1   | TWIST1   | PDGFRA | PDGFRB |
|--------------------|---------|----------|--------|--------|
| FOXQ1              |         | 0.164    | 0.16   | 0.143  |
| TWIST1             | 0.00227 |          | 0.375  | 0.32   |
| PDGFRA             | 0.0431  | 2.33E-11 |        | 0.709  |
| PDGFRB             | 0.0107  | 3.36E-10 | 0      |        |

**Supplementary Figure S4. Correlation and survival analysis of Foxq1 and Twist1 with PDGFR $\alpha$  and PDGFR $\beta$  in tumor samples.** **A**, The expression correlation of Foxq1 or Twist1 with PDGFR $\alpha$  and  $\beta$  in breast cancer. Level 3 gene expression (RNAseV2) data of breast tumors from The Cancer Genome Atlas (TCGA) database was used for the analysis. In the table, the upper panels (highlighted in green) show correlation coefficients and the lower panels (highlighted in orange) include the corresponding correlation p-values. **B**, The Kaplan-meier plot shows that overexpression of Foxq1 and Twist1 with PDGFRs predicts poor survival of breast cancer patients in TCGA dataset (\* $P$ <0.05). **C**, The expression correlation of Foxq1 or Twist1 with PDGFR $\alpha$  and  $\beta$  in Uterine corpus endometrial carcinoma (UCEC). Level 3 gene expression (RNAseV2) data in UCEC from The Cancer Genome Atlas (TCGA) database was used for the analysis. The table setting is same as in panel A.

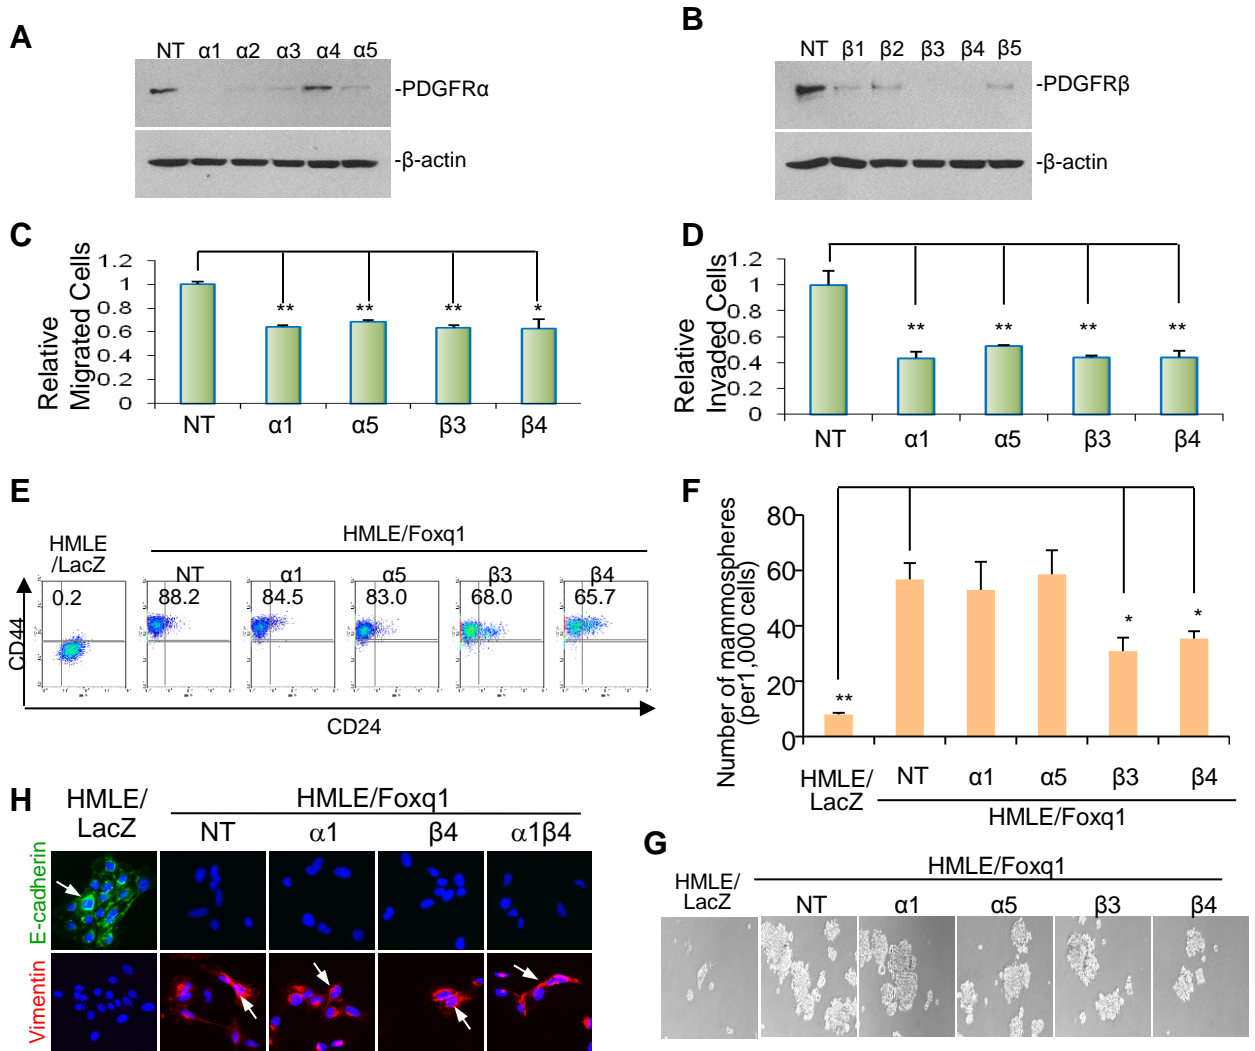

**Supplementary Figure S5. Effect of PDGFR $\alpha$  and PDGFR $\beta$  on cell migration, invasion and stem cell characteristics.** **A-B**, Knockdown of PDGFR $\alpha$  (A) and PDGFR $\beta$  (B) expression in HMLE /Foxq1 cells. Five different shRNAs specifically targeting PDGFR $\alpha$  or  $\beta$  were tested.  $\beta$ -actin was used as a protein loading control. **C-D**, The effect of PDGFRs silencing on cell migration and invasion of HMLE/Foxq1 cells. All stable cell lines with significant inhibition of PDGFR $\alpha$  and  $\beta$  expression showed significant decrease in cell migration (C) ( $*P < 0.05$ ) and invasion (D) ( $**P < 0.01$ ). **E** Effect of PDGFRs on Foxq1 induced CD44<sup>high</sup>/CD24<sup>low</sup> cell population. Two PDGFR $\alpha$  knockdown cells showed minor cell population changes, while two PDGFR $\beta$  knockdown cell models showed marked decrease of CD44<sup>high</sup>/CD24<sup>low</sup> cell population. **F**, Summary of the effect of PDGFR $\alpha$  and PDGFR $\beta$  knockdown on mammosphere formation of HMLE/Foxq1 cells ( $*P < 0.05$ ,  $**P < 0.01$ ). **G**, Representative figures of mammosphere formation of HMLE/Foxq1 cells with PDGFR $\alpha$  and PDGFR $\beta$  knockdown. **H**, Immunofluorescence assay showed no expression change of E-cadherin and Vimentin in HMLE/Foxq1 cells with individual and double knockdown of PDGFR $\alpha$  and  $\beta$ .

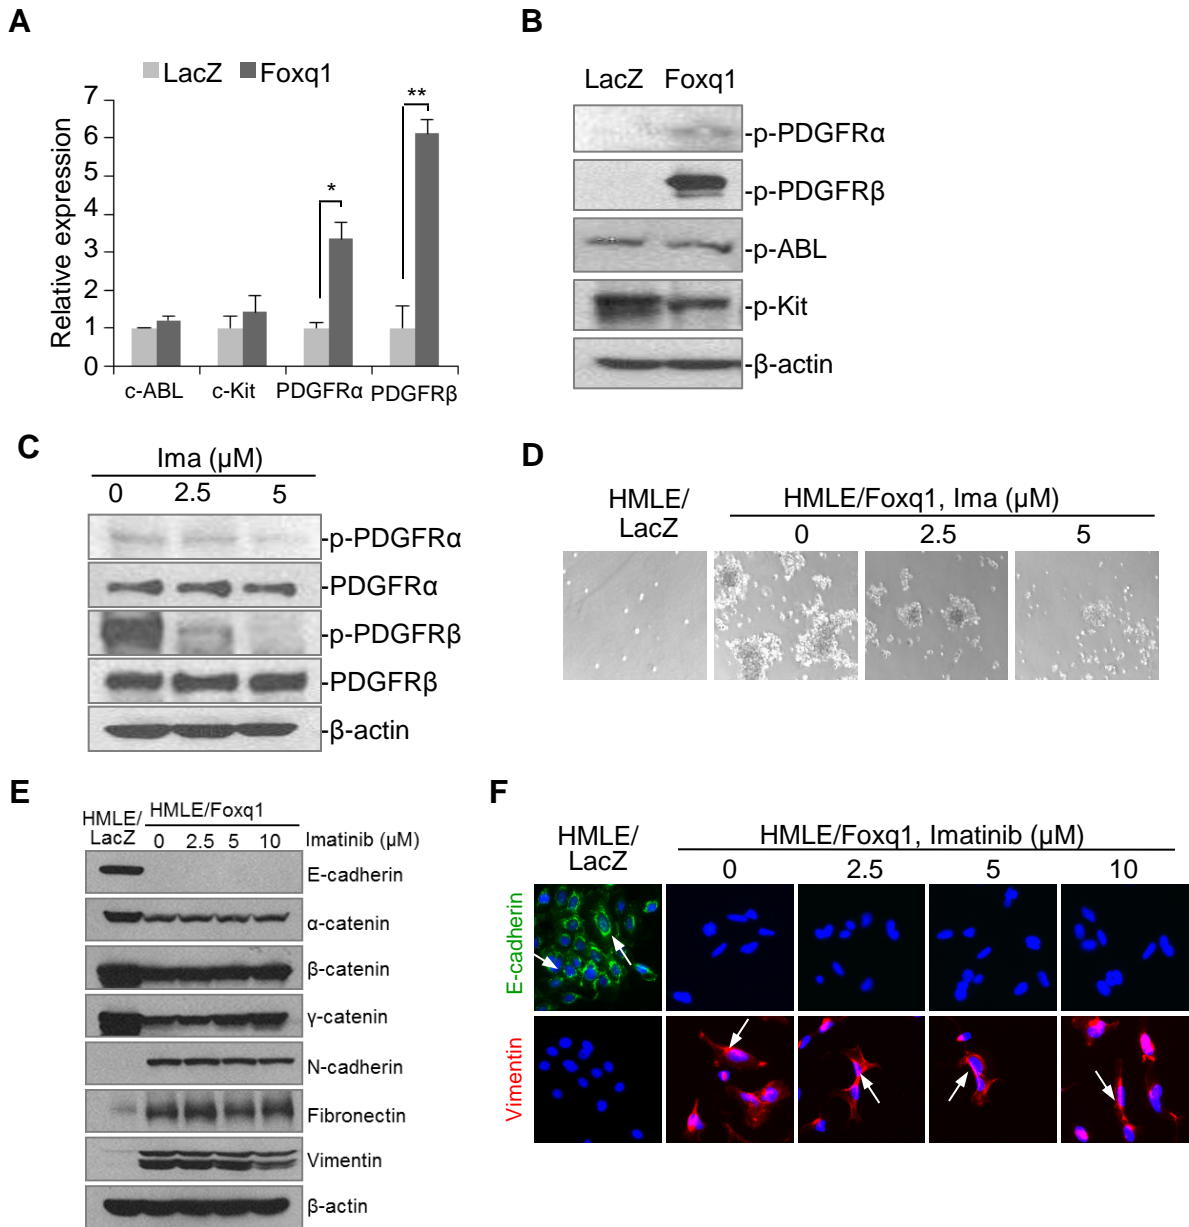

**Supplementary Figure S6. Imatinib treatment on PDGFRs phosphorylation, mammosphere formation and EMT.** **A**, The expression of c-abl, kit and PDGFRs in HMLE cells with Foxq1 or control LacZ overexpression was detected by real time RT-PCR ( $*P < 0.05$ ,  $**P < 0.01$ ). **B**, Overexpression of Foxq1 leads to phosphorylation of PDGFR $\alpha$  and  $\beta$ , but not the c-ABL and c-kit. **C**, imatinib (Ima) treatment inhibit phosphorylation of PDGFRs. Western blot analysis was performed using total and phosphor-PDGFR $\alpha$  and  $\beta$  antibodies. **D**, Representative figures for mammosphere formation in HMLE/Foxq1 cells after treatment of different doses of imatinib. **E**, No expression changes for epithelial and mesenchymal markers in HMLE/Foxq1 cells with different doses of imatinib treatment were detected by western blotting assay. **F**, Immunofluorescence assay shows no expression change of E-cadherin and Vimentin proteins in HMLE/Foxq1 cells with different doses of imatinib treatment.

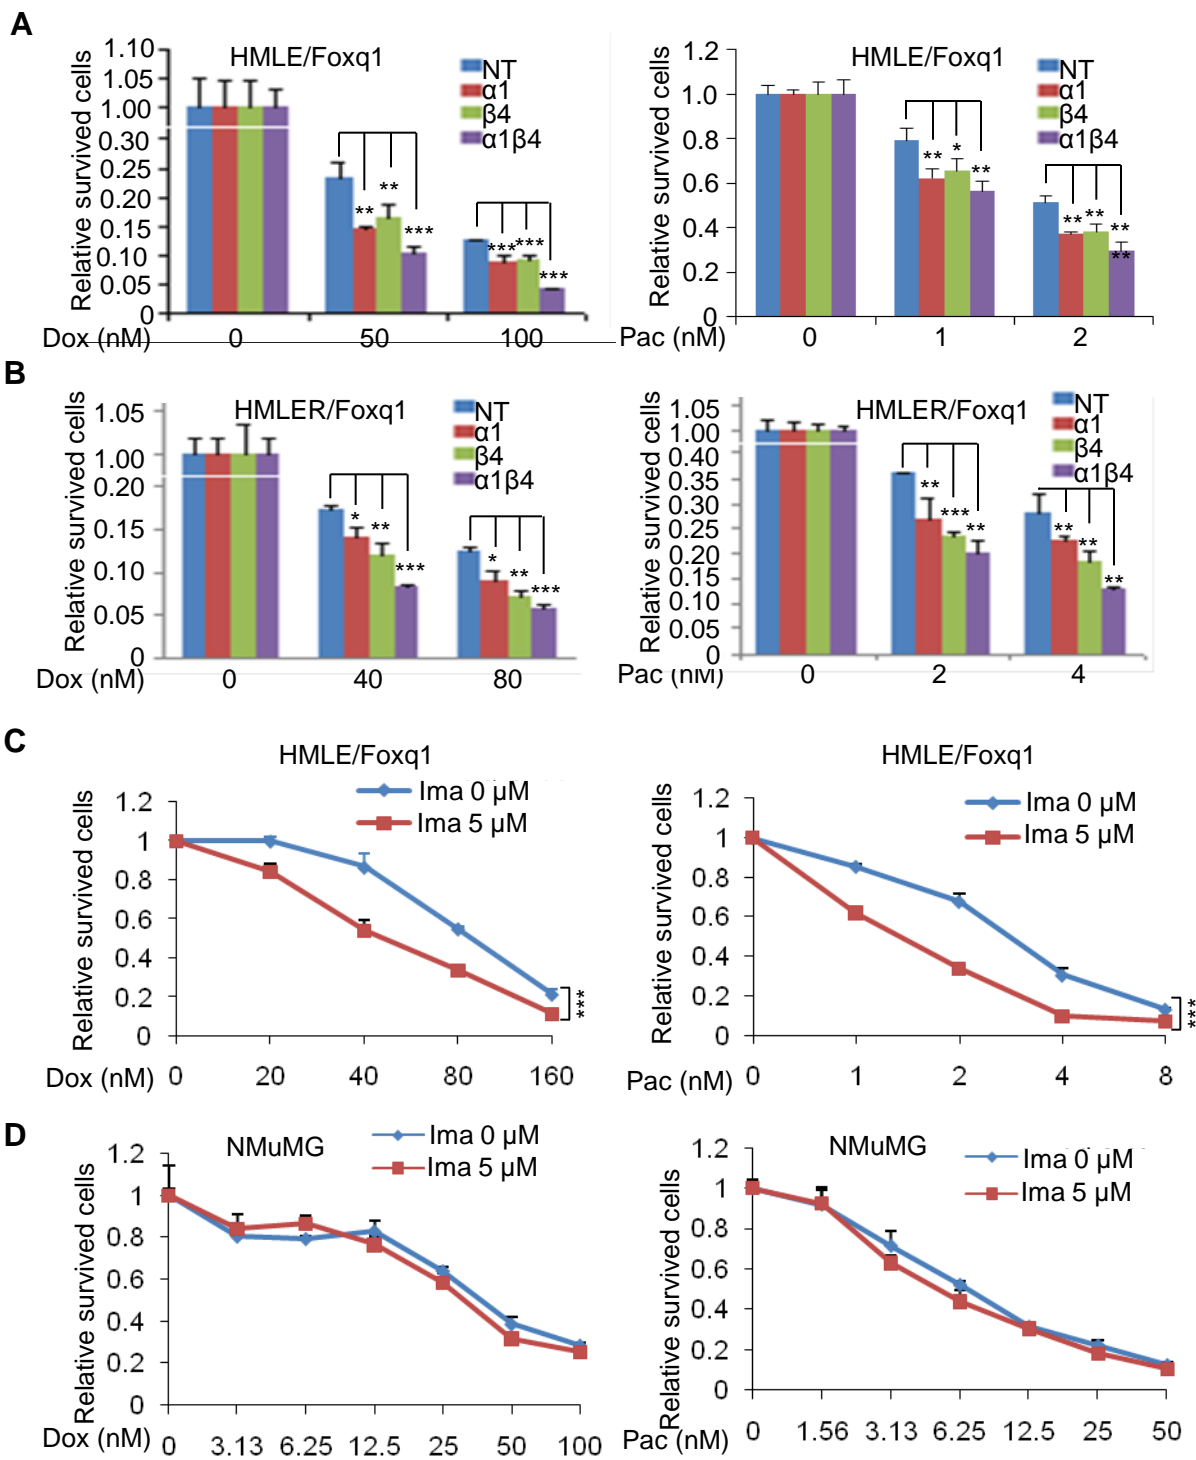

**Supplementary Figure S7. The Effect of PDGFRs on chemoresistance.** **A and B**, Chemoresistance of HMLE/Foxq1 (A) and HMLER/Foxq1 (B) cells with individual or double PDGFR $\alpha$  and  $\beta$  knockdown was analyzed by an MTT assay after treatment with various doses of doxorubicin (left panel) and paclitaxel (right panel). Results are presented as relative cell survival compared to the non-treatment control (\* $P$ <0.05, \*\* $P$ <0.01 and \*\*\* $P$ <0.001). **C**, Increased sensitivity of HMLE/Foxq1 cells to doxorubicin (left panel) or paclitaxel (right panel) in the presence of imatinib (\*\*\* $P$ <0.001). **D**, NMuMG cells shows no increased sensitivity to doxorubicin (left panel) and paclitaxel (right panel) in the presence of imatinib ( $P$ >0.05).

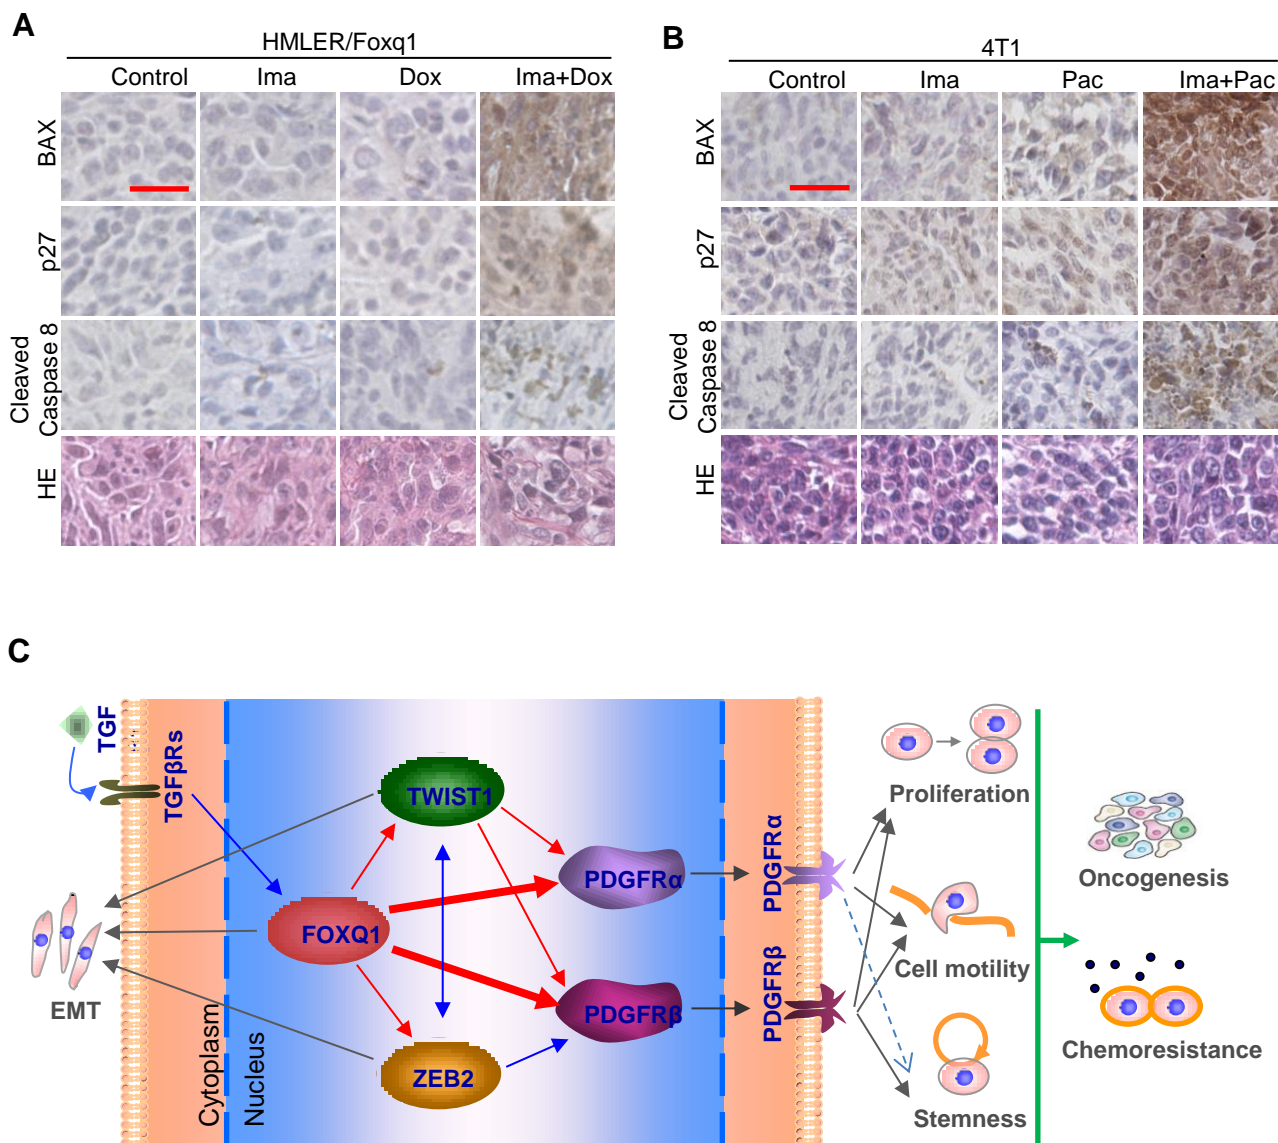

**Supplementary Figure S8. Immunohistochemistry (IHC) assays using tumor samples and our working model.** **A**, Tumors were collected from the HMLER/Foxq1 implanted NCR nu/nu mice, and the prepared tissue slides were analyzed with IHC using anti-BAX, p27 and Cleaved Caspase 8 antibodies, as well as H&E staining. The origins of all four tumor samples are indicated at the top of the panels. Scale bar, 50  $\mu$ m. **B**, Tumors were collected from 4T1 implanted BALB/c mice. The other settings are the same as panel A. **C**, Schematic model of the molecular mechanism underlying Foxq1/PDGFR-driven breast cancer oncogenesis and chemoresistance. Foxq1, an EMT promoting transcription factor, simultaneously regulates PDGFR $\alpha$  and  $\beta$  genes through direct or indirect mechanisms. Twist1 and Zeb2 are the mediators of Foxq1's indirect regulatory mechanism. This study reveals the central regulatory role of Foxq1 in the TGF $\beta$  and PDGF signaling transition. Moreover, the results of this study highlight PDGFR as important mediator of Foxq1/Twist1 promoted oncogenesis and chemoresistance, which suggests an implication of designing novel combinational therapy for breast cancer treatment (the dashed line indicates a relationship need further validation of *in vivo* study).
